# Supplementary material
Source: HighWire-hosted journal article supplement (http://www.jneurosci.org/highwire/filestream/598168/field_highwire_adjunct_files/3/Supplementary_Table_1_res.pdf)
Supplement: Supplementary_Table_1_res.pdf [file Supplementary_Table_1_res.pdf]

**Supplementary Table 1.**

| Region                | SIC Rise time<br>(ms) | SIC Decay time<br>(ms) | SIC Amplitude<br>(pA) | N  |
|-----------------------|-----------------------|------------------------|-----------------------|----|
| CA3                   | 59.4 ± 25.2           | 400.5 ± 86.3           | -143.9 ± 67.5         | 15 |
| CA1                   | 49.1 ± 9.2            | 367.9 ± 95.2           | -78.8 ± 14.1          | 30 |
| Cortex                | 83.5 ± 21.8           | 617.6 ± 143.6          | -86.7 ± 14.9          | 24 |
| Cortex + CNQX (25 µM) | 47.6 ± 6.9            | 268.5 ± 56.8           | -91.8 ± 27.1          | 23 |

**Supplementary table 1 legend:** Among different brain regions SICs share similar kinetic properties. Mean rise, decay time and amplitude for SICs recorded in different brain regions in 0 extracellular  $Mg^{2+}$ , picrotoxin 50-100 µM, TTX 1 µM after 20 minutes of epileptiform activity induced by slice perfusion with 0 extracellular  $Mg^{2+}$  and picrotoxin. In the CA3 region, two of the seven cells with SICs activity displayed SICs of unusual high amplitude ( $-943.1 \pm 342.7$  pA, N = 15) and where thus excluded from the calculation of the mean.
